# Supplementary material
Source: publisher figshare collection journal article supplement (https://diabetesjournals.figshare.com/ndownloader/files/27577649)
Supplement: Supplementary file 1 [file 27577649]

## Supplementary Information

Ludvigsson et al.

**Supplementary Table 1.** Summary of clinical end points for the GAD-alum treatment group compared to Placebo, in the Full Analysis Set and the subgroup defined by patients carrying the HLA DR3-DQ2.

|                                                                            |                     |                                         | Full Analysis Set      | HLA DR3-DQ2 subgroup     |
|----------------------------------------------------------------------------|---------------------|-----------------------------------------|------------------------|--------------------------|
| Change in stimulated C-peptide AUC from baseline<br>GAD-alum / Placebo     | Visit 6<br>Month 6  | Estimated treatment ratio (95% CI)      | 1.111 (0.951; 1.298)   | 1.313 (0.953; 1.809)     |
|                                                                            |                     | P value                                 | 0.1821                 | 0.0948                   |
|                                                                            | Visit 7<br>Month 15 | Estimated treatment ratio (95% CI)      | 1.091 (0.845; 1.408)   | 1.557 (1.126; 2.153)     |
|                                                                            |                     | P value                                 | 0.5009                 | 0.0078                   |
| Change in IDA1C from baseline<br>GAD-alum / Placebo                        | Visit 6<br>Month 6  | Estimated treatment difference (95% CI) | -0.153 (-0.732; 0.426) | -0.903 (-1.868; 0.062)   |
|                                                                            |                     | P value                                 | 0.6013                 | 0.0665                   |
|                                                                            | Visit 7<br>Month 15 | Estimated treatment difference (95% CI) | 0.299 (-0.434; 1.031)  | -0.692 (-1.868; 0.483)   |
|                                                                            |                     | P value                                 | 0.4204                 | 0.2449                   |
| Change in HbA1C from baseline<br>GAD-alum / Placebo                        | Visit 6<br>Month 6  | Estimated treatment difference (95% CI) | -3.027 (-6.643; 0.589) | -7.143 (-12.999; -1.287) |
|                                                                            |                     | P value                                 | 0.0999                 | 0.0173                   |
|                                                                            | Visit 7<br>Month 15 | Estimated treatment difference (95% CI) | -0.908 (-5.525; 3.709) | -5.812 (-13.176; 1.552)  |
|                                                                            |                     | P value                                 | 0.6975                 | 0.1206                   |
| Change in daily exogenous insulin dose from baseline<br>GAD-alum / Placebo | Visit 6<br>Month 6  | Estimated treatment difference (95% CI) | 0.018 (-0.066; 0.102)  | -0.091 (-0.227; 0.045)   |
|                                                                            |                     | P value                                 | 0.6694                 | 0.1866                   |
|                                                                            | Visit 7<br>Month 15 | Estimated treatment difference (95% CI) | 0.081 (-0.036; 0.198)  | -0.058 (-0.241; 0.126)   |
|                                                                            |                     | P value                                 | 0.1745                 | 0.5331                   |
| Change in maximum stimulated C-peptide from baseline<br>GAD-alum / Placebo | Visit 6<br>Month 6  | Estimated treatment difference (95% CI) | 0.041 (-0.092; 0.174)  | 0.210 (0.006; 0.413)     |
|                                                                            |                     | P value                                 | 0.5422                 | 0.0432                   |
|                                                                            | Visit 7<br>Month 15 | Estimated treatment difference (95% CI) | -0.005 (-0.139; 0.129) | 0.131 (-0.075; 0.337)    |
|                                                                            |                     | P value                                 | 0.9403                 | 0.2104                   |
| Change in fasting C-peptide from baseline<br>GAD-alum / Placebo            | Visit 6<br>Month 6  | Estimated treatment difference (95% CI) | 0.050 (0.001; 0.099)   | 0.103 (0.029; 0.178)     |
|                                                                            |                     | P value                                 | 0.0447                 | 0.0071                   |
|                                                                            | Visit 7<br>Month 15 | Estimated treatment difference (95% CI) | -0.003 (-0.052; 0.047) | 0.033 (-0.043; 0.109)    |
|                                                                            |                     | P value                                 | 0.9155                 | 0.3927                   |
| Maximum stimulated C-peptide >0.2 nmol/L                                   | Visit 7<br>Month 15 | GAD-alum n (%)                          | 51 (92.7%)             | 28 (96.6%)               |
|                                                                            |                     | Placebo n (%)                           | 37 (75.5%)             | 12 (70.6%)               |
|                                                                            |                     | GAD-alum 95% CI <sup>a</sup>            | 82.4 - 98.0            | 82.2 - 99.9              |
|                                                                            |                     | Placebo 95% CI <sup>a</sup>             | 61.1 - 86.7            | 44.0 - 89.7              |
| Stimulated 90 Minutes C-peptide >0.2 nmol/L                                | Visit 7<br>Month 15 | P value <sup>b</sup>                    | 0.0159                 | 0.0284                   |
|                                                                            |                     | GAD-alum n (%)                          | 48 (87.3%)             | 28 (96.6%)               |
|                                                                            |                     | Placebo n (%)                           | 35 (71.4%)             | 11 (64.7%)               |
|                                                                            |                     | GAD-alum 95% CI <sup>a</sup>            | 75.5 - 94.7            | 82.2 - 99.9              |
|                                                                            |                     | Placebo 95% CI <sup>a</sup>             | 56.7 - 83.4            | 38.3 - 85.8              |
|                                                                            |                     | P value <sup>b</sup>                    | 0.0445                 | 0.0086                   |

|             |                     |                                                             |                            |                            |
|-------------|---------------------|-------------------------------------------------------------|----------------------------|----------------------------|
| IDAA1C <= 9 | Visit 7<br>Month 15 | GAD-alum n (%) Placebo n (%)                                | 32 (62.7%)<br>27 (61.4%)   | 22 (78.6%)<br>6 (40.0%)    |
|             |                     | GAD-alum 95% CI <sup>a</sup><br>Placebo 95% CI <sup>a</sup> | 48.1 - 75.9<br>45.5 - 75.6 | 59.0 - 91.7<br>16.3 - 67.7 |
|             |                     | P value <sup>b</sup>                                        | 0.8883                     | 0.0310                     |

Change in C-peptide  $AUC_{\text{mean } 0-120\text{min}}$  was analysed on the log scale and back transformed to original scale. Continuous variables were analysed using Mixed Model Repeated Measures [MMRM]). The model for analysis included fixed, categorical effects of treatment, randomization strata (GADA level), visit, Presence or not of HLA DR3-DQ2 haplotype and treatment by visit by HLA DR3-DQ2 haplotype interaction, as well as the continuous, fixed covariate of log-transformed baseline C-peptide  $AUC_{\text{mean } 0-120\text{min}}$ .

Least square means (95% confidence intervals) are given together with p-values from this model. The MMRM did not converge when unstructured covariance structure was used. For this reason, compound symmetry structure was used instead.

<sup>a</sup> Clopper-Pearson's CI of patient proportion.

<sup>b</sup> P-value for Cochran-Mantel-Haenszel (non-zero correlation) (stratified by GAD65A level)

**Supplementary Table 2** - Summary of Treatment Emergent Adverse Events (AE) observed in the two groups (GAD-alum and Placebo) between the baseline and Month 15 Visits (Safety Set).

| Body System or Organ Class                           | GAD-alum (n=57)<br>Total AEs: 28 (49.1%) 66 |                           | Placebo (n=52)<br>Total AEs: 30 (57.7%) 66 |                           |
|------------------------------------------------------|---------------------------------------------|---------------------------|--------------------------------------------|---------------------------|
|                                                      | Not related                                 | Possibly/Probably Related | Not related                                | Possibly/Probably Related |
| Blood and lymphatic system disorders                 | 2 (3.5%) 3                                  |                           | 2 (3.8%) 2                                 |                           |
| Cardiac disorders                                    |                                             | 1 (1.8%) 1                |                                            |                           |
| Gastrointestinal disorders                           | 2 (3.5%) 2                                  |                           | 5 (9.6%) 7                                 |                           |
| General disorders and administration site conditions | 2 (3.5%) 2                                  | 1 (1.8%) 1                | 5 (9.6%) 6                                 | 2 (3.8%) 3                |
| Hepatobiliary disorders                              |                                             |                           | 1 (1.9%) 1                                 |                           |
| Immune system disorders                              |                                             |                           | 1 (1.9%) 1                                 |                           |
| Infections and infestations                          | 15 (26.3%) 24                               | 2 (3.5%) 2                | 13 (25.0%) 21                              | 1 (1.9%) 1                |
| Injury, poisoning and procedural complications       | 4 (7.0%) 5                                  |                           | 3 (5.8%) 3                                 |                           |
| Investigations                                       | 1 (1.8%) 1                                  | 1 (1.8%) 1                |                                            |                           |
| Metabolism and nutrition disorders                   | 1 (1.8%) 1                                  |                           | 2 (3.8%) 2                                 | 1 (1.9%) 1                |
| Musculoskeletal and connective tissue disorders      | 4 (7.0%) 4                                  |                           | 3 (5.8%) 5                                 | 1 (1.9%) 1                |
| Nervous system disorders                             | 3 (5.3%) 3                                  |                           | 2 (3.8%) 2                                 |                           |
| Psychiatric disorders                                | 3 (5.3%) 3                                  |                           | 1 (1.9%) 1                                 |                           |
| Renal and urinary disorders                          |                                             |                           | 1 (1.9%) 1                                 |                           |
| Reproductive system and breast disorders             |                                             | 1 (1.8%) 2                | 1 (1.9%) 1                                 | 1 (1.9%) 1                |
| Respiratory, thoracic and mediastinal disorders      | 2 (3.5%) 3                                  | 1 (1.8%) 2                | 2 (3.8%) 2                                 |                           |
| Skin and subcutaneous tissue disorders               | 5 (8.8%) 5                                  | 1 (1.8%) 1                | 2 (3.8%) 2                                 | 2 (3.8%) 2                |
| Injection site reactions <sup>a</sup>                |                                             | 45 (78.9%) 414            |                                            | 39 (75.0%) 307            |

n (%) N : n (%) represents the number of patients with at least one AE (percentage) and N the total number of AEs.

<sup>a</sup> Injection site reactions were collected by the investigators at the clinics as well as reported by subjects in their diaries.

### Supplementary Figure 1 – C-peptide $AUC_{\text{mean } 0-120 \text{ min}}$ over time.

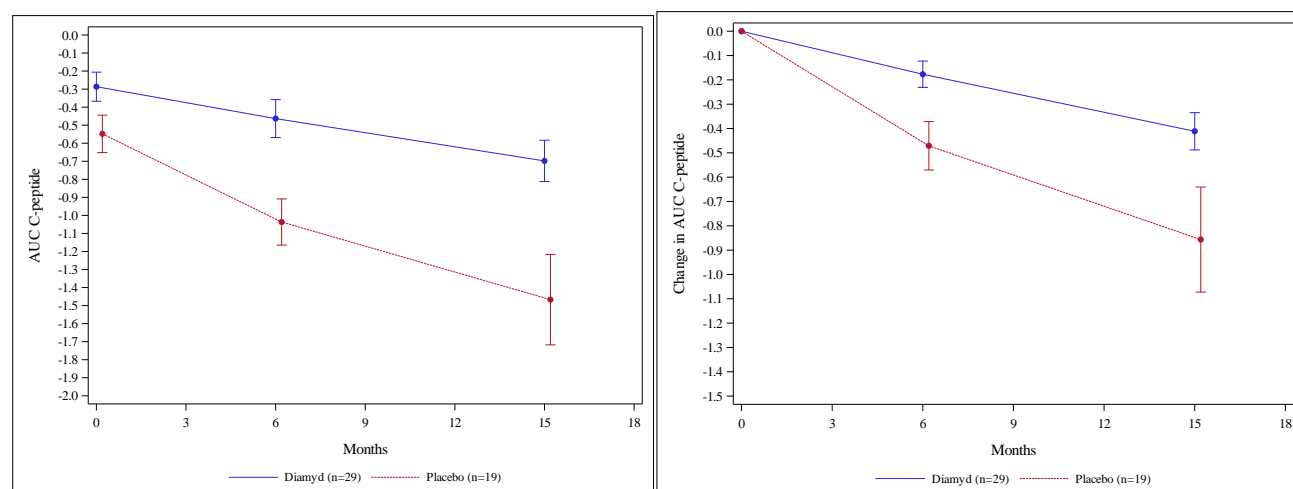

**Figure 1.** C-peptide  $AUC_{\text{mean } 0-120 \text{ min}}$

Log-transformed C-peptide  $AUC_{\text{mean } 0-120 \text{ min}}$  during a Mixed-Meal Tolerance Test for the two treatment groups (GAD-alum and Placebo) in the prespecified subgroup HLA DR3-DQ2 (**left**). Change from baseline of log-transformed C-peptide  $AUC_{\text{mean } 0-120 \text{ min}}$  during a Mixed-Meal Tolerance Test for the two treatment groups (GAD-alum and Placebo) in the prespecified subgroup HLA DR3-DQ2 (**right**). Error bars indicate standard deviation.
